# Supplementary material for: Phase I and II Clinical Trial Comparing the LBSap, Leishmune®, and Leish-Tec® Vaccines against Canine Visceral Leishmaniasis
Source: MDPI journal article supplement (doi:10.3390/vaccines8040690), 2020-11-17
Supplement: s1 [file s1]

**Table S1.** Evaluation of Safety and Toxicity in control dogs and dogs submitted to different vaccine protocols.

| Groups                              | Time | Weight loss | Fever | Edema/Nodule | Local pain |
|-------------------------------------|------|-------------|-------|--------------|------------|
| 24–72h after<br>1 <sup>o</sup> dose |      |             |       |              |            |
| Control                             |      | -           | -     | -            | -          |
| LBSap                               |      | -           | 1     | 3            | -          |
| Leishmune                           |      | -           | -     | 2            | -          |
| Leish-Tec                           |      | -           | -     | -            | -          |
| 24–72h after<br>2 <sup>o</sup> dose |      |             |       |              |            |
| Control                             |      | -           | -     | -            | -          |
| LBSap                               |      | -           | 3     | 2            | -          |
| Leishmune                           |      | -           | 2     | 2            | -          |
| Leish-Tec                           |      | -           | -     | -            | -          |
| 24–72h after<br>3 <sup>o</sup> dose |      |             |       |              |            |
| Control                             |      | -           | -     | -            | -          |
| LBSap                               |      | -           | 4     | 7            | 1          |
| Leishmune                           |      | -           | -     | 5            | 1          |
| Leish-Tec                           |      | -           | -     | -            | -          |

Number of dogs in each of the vaccine groups that presented some of the physiological and / or behavioral changes evaluated, such as: Weight loss; Fever (rectal temperature above 39.5 °C); changes in the site of immunizations (nodule or edema; local pain); for 72 hours after each of the three vaccinations in the control groups (C); saponin-associated *L. braziliensis* vaccine (LBSap); Leishmune® vaccine; Leish-Tec® vaccine; Evaluation times: 24–72h 1st dose = twenty four to seventy-two hours after the first dose of immunization; 24–72h 2nd dose = twenty four to seventy-two hours after the second immunization dose; 24–72h 3rd dose = twenty four to seventy-two hours after the third dose of immunization. The number of dogs in each group was 7. The " - " represents that there was no change in that group.

**Table S2.** Leukogram of control dogs and dogs submitted to different vaccine protocols.

| Groups                 | Times | Global Leukocytes                | Lymphocytes                     | Monocytes                     | Neutrophils                     | Eosinophils                   |
|------------------------|-------|----------------------------------|---------------------------------|-------------------------------|---------------------------------|-------------------------------|
| Reference values       |       | 7408–14440<br>(mm <sup>3</sup> ) | 2299–5119<br>(mm <sup>3</sup> ) | 147–601<br>(mm <sup>3</sup> ) | 3839–9379<br>(mm <sup>3</sup> ) | 150–710<br>(mm <sup>3</sup> ) |
| T0                     |       |                                  |                                 |                               |                                 |                               |
| Control <sup>a</sup>   |       | 10,660 ± 777                     | 3359 ± 242                      | 323 ± 136                     | 6191 ± 1344                     | 424 ± 196                     |
| LBSap <sup>b</sup>     |       | 10,414 ± 1389                    | 3537 ± 564                      | 354 ± 125                     | 6158 ± 1132 <sup>††</sup>       | 230 ± 221                     |
| Leishmune <sup>c</sup> |       | 12,020 ± 2367                    | 3691 ± 704                      | 376 ± 151                     | 7160 ± 1844                     | 493 ± 336                     |
| Leish-Tec <sup>d</sup> |       | 11,625 ± 850                     | 3961 ± 710                      | 445 ± 200                     | 7035 ± 1511                     | 467 ± 387                     |
| T1                     |       |                                  |                                 |                               |                                 |                               |
| Control <sup>a</sup>   |       | 10,057 ± 1756                    | 3320 ± 676                      | 358 ± 64                      | 5974 ± 1228                     | 516 ± 237                     |
| LBSap <sup>b</sup>     |       | 12,371 ± 1699 <sup>a</sup>       | 3003 ± 351                      | 364 ± 82                      | 8559 ± 1963 <sup>a</sup>        | 445 ± 292                     |
| Leishmune <sup>c</sup> |       | 12,533 ± 2386                    | 3336 ± 794                      | 366 ± 218                     | 7714 ± 2212                     | 806 ± 343                     |
| Leish-Tec <sup>d</sup> |       | 12,150 ± 2545                    | 3467 ± 853                      | 330 ± 54                      | 7768 ± 1721                     | 585 ± 351                     |

Absolute values (mean ± standard deviation) of the leukogram of dogs submitted to different vaccine protocols: control (C); *L. braziliensis* vaccine plus saponin (LBSap); Leishmune® vaccine (LM); Leish-Tec® vaccine (LT); Evaluation times: T0 = before the first immunization; T1 = 15 days after the third immunization; The significant differences ( $p < 0.05$ ) are represented by the letters a, b, c, and d related to groups C, LBSap, LM, LT, respectively. The significant differences ( $p < 0.05$ ) in the longitudinal evaluation of each leukogram parameter are represented by the abbreviations T0 and T1.

**Table S3.** Erythrogram of control dogs and dogs submitted to different vaccine protocols.

| Groups                 | Times | Red Blood Cells                                  | Hemoglobin          | Hematocrit       | Platelets                                      |
|------------------------|-------|--------------------------------------------------|---------------------|------------------|------------------------------------------------|
| Reference values       |       | 5.42–8.38<br>(10 <sup>6</sup> /mm <sup>3</sup> ) | 13.2–21.2<br>(g/dL) | 33.7–57.3<br>(%) | 171–384<br>(10 <sup>3</sup> /mm <sup>3</sup> ) |
| T0                     |       |                                                  |                     |                  |                                                |
| Control <sup>a</sup>   |       | 7.20 ± 0.69                                      | 17.9 ± 2.1          | 50.2 ± 5.5       | 282 ± 71                                       |
| LBSap <sup>b</sup>     |       | 6.81 ± 0.58                                      | 17.5 ± 1.5          | 44.4 ± 6.5       | 268 ± 74                                       |
| Leishmune <sup>c</sup> |       | 7.25 ± 1.06                                      | 18.4 ± 2.1          | 46.7 ± 6.4       | 245 ± 108                                      |
| Leish-Tec <sup>d</sup> |       | 7.22 ± 0.32                                      | 18.3 ± 1.1          | 48.6 ± 4.7       | 237 ± 37                                       |
| T1                     |       |                                                  |                     |                  |                                                |
| Control <sup>a</sup>   |       | 7.15 ± 0.63                                      | 18.4 ± 2.3          | 44.9 ± 5.2       | 296 ± 63                                       |
| LBSap <sup>b</sup>     |       | 7.13 ± 0.76                                      | 18.4 ± 2.1          | 44.9 ± 5.1       | 306 ± 93                                       |
| Leishmune <sup>c</sup> |       | 7.77 ± 0.67                                      | 19.7 ± 1.4          | 48.5 ± 4.0       | 287 ± 46                                       |
| Leish-Tec <sup>d</sup> |       | 7.16 ± 0.40                                      | 18.4 ± 1.0          | 44.5 ± 3.4       | 344 ± 31                                       |

Absolute values (mean ± standard deviation) of the erythrogram (total red blood cells, hemoglobin, hematocrit and platelets) of dogs submitted to different vaccine protocols: control (C); *L. braziliensis* plus saponin (LBSap); Leishmune<sup>®</sup> vaccine (LM); Leish-Tec<sup>®</sup> vaccine (LT); Evaluation times: T0 = before the first immunization; T1 = 15 days after the third immunization. The significant differences ( $p < 0.05$ ) are represented by the letters a, b, c, and d related to groups C, LBSap, LM, LT, respectively.

**Table S4.** Biochemical analyses of hepatic function of control dogs and dogs submitted to different vaccine protocols.

| Groups                 | Times | TGO/AST            | TGP/ALT            | Gama-GT          | Alkaline phosphatase | Total Bilirubin      |
|------------------------|-------|--------------------|--------------------|------------------|----------------------|----------------------|
| Reference values       |       | 26.1–48.1<br>(U/L) | 31.2–63.2<br>(U/L) | 0.6–7.8<br>(U/L) | 11.8–51.0 (U/L)      | 0.05–0.69<br>(mg/dL) |
| T0                     |       |                    |                    |                  |                      |                      |
| Control <sup>a</sup>   |       | 38.7 ± 5.6         | 49.4 ± 5.9         | 3.7 ± 1.9        | 28.0 ± 9.9           | 0.42 ± 0.17          |
| LBSap <sup>b</sup>     |       | 34.7 ± 5.8         | 45.3 ± 6.3         | 4.9 ± 1.8        | 28.6 ± 8.2           | 0.44 ± 0.13          |
| Leishmune <sup>c</sup> |       | 37.4 ± 3.4         | 48.4 ± 8.8         | 4.8 ± 2.1        | 24.3 ± 5.7           | 0.49 ± 0.15          |
| Leish-Tec <sup>d</sup> |       | 38.2 ± 5.1         | 49.0 ± 10.6        | 5.1 ± 1.6        | 32.0 ± 9.5           | 0.28 ± 0.08          |
| T1                     |       |                    |                    |                  |                      |                      |
| Control <sup>a</sup>   |       | 38.3 ± 4.1         | 44.0 ± 10.1        | 5.9 ± 0.9        | 36.0 ± 8.2           | 0.27 ± 0.16          |
| LBSap <sup>b</sup>     |       | 38.0 ± 4.1         | 44.3 ± 10.2        | 6.0 ± 1.7        | 42.3 ± 5.2           | 0.26 ± 0.14          |
| Leishmune <sup>c</sup> |       | 41.0 ± 4.9         | 52.2 ± 11.2        | 6.8 ± 1.3        | 36.8 ± 6.8           | 0.39 ± 0.21          |
| Leish-Tec <sup>d</sup> |       | 40.1 ± 4.6         | 49.8 ± 7.5         | 4.5 ± 2.4        | 30.0 ± 5.4           | 0.29 ± 0.18          |

Absolute values (mean ± standard deviation) of hepatic function (TGO / AST, TGP / ALT, Gamma-GT, alkaline phosphatase, total bilirubin) of dogs submitted to different vaccine protocols: control (C); *L. braziliensis* plus saponin (LBSap); Leishmune<sup>®</sup> vaccine (LM); Leish-Tec<sup>®</sup> vaccine (LT); Evaluation times: T0 = before the first immunization, T1 = 15 days after the third immunization. The significant differences ( $p < 0.05$ ) are represented by the letters a, b, c, and d related to groups C, LBSap, LM, LT, respectively.

**Table S5.** Biochemical analyses of the proteinogram and renal function of control dogs and of dogs submitted to different vaccine protocols.

| Groups                 | Times | Total Protein     | Albumin           | Globulin          | Ratio A/G | Urea                 | Creatinine         |
|------------------------|-------|-------------------|-------------------|-------------------|-----------|----------------------|--------------------|
| Reference values       |       | 6.4–8.9<br>(g/dL) | 1.5–6.7<br>(g/dL) | 0.7–6.3<br>(g/dL) | 0.05–3.25 | 28.0–40.1<br>(mg/dL) | 0.6–1.5<br>(mg/dL) |
| T0                     |       |                   |                   |                   |           |                      |                    |
| Control <sup>a</sup>   |       | 7.5 ± 0.6         | 4.9 ± 0.6         | 2.6 ± 0.9         | 2.2 ± 1.1 | 35.6 ± 1.0           | 1.2 ± 0.3          |
| LBSap <sup>b</sup>     |       | 7.3 ± 0.6         | 4.6 ± 0.5         | 2.7 ± 0.8         | 1.9 ± 0.7 | 36.2 ± 1.0           | 1.2 ± 0.2          |
| Leishmune <sup>c</sup> |       | 7.8 ± 0.6         | 5.0 ± 1.0         | 2.7 ± 0.8         | 2.1 ± 1.1 | 36.7 ± 1.5           | 1.0 ± 0.1          |
| Leish-Tec <sup>d</sup> |       | 7.5 ± 0.8         | 4.7 ± 0.4         | 2.8 ± 1.0         | 1.9 ± 0.9 | 36.9 ± 1.5           | 1.1 ± 0.2          |
| T1                     |       |                   |                   |                   |           |                      |                    |
| Control <sup>a</sup>   |       | 6.7 ± 1.9         | 2.4 ± 0.6         | 3.5 ± 1.3         | 0.7 ± 0.4 | 29.5 ± 1.6           | 1.1 ± 0.1          |

|                              |           |           |           |           |            |           |
|------------------------------|-----------|-----------|-----------|-----------|------------|-----------|
| <b>LBSap<sup>b</sup></b>     | 6.7 ± 1.9 | 2.3 ± 0.9 | 4.1 ± 1.0 | 0.5 ± 0.2 | 32.1 ± 3.1 | 1.0 ± 0.1 |
| <b>Leishmune<sup>c</sup></b> | 6.7 ± 1.0 | 2.5 ± 0.9 | 4.2 ± 0.5 | 0.6 ± 0.2 | 30.9 ± 5.9 | 1.0 ± 0.1 |
| <b>Leish-Tec<sup>d</sup></b> | 6.8 ± 1.2 | 2.2 ± 0.7 | 5.1 ± 1.1 | 0.4 ± 0.1 | 30.1 ± 1.5 | 1.0 ± 0.1 |

Absolute values (mean ± standard deviation) of the proteinogram (total protein, albumin, globulin and albumin / globulin - A / G ratio) and renal function (urea and creatinine) of dogs submitted to different vaccine protocols: control (C); *L. braziliensis* plus saponin (LBSap); Leishmune<sup>®</sup> vaccine (LM); Leish-Tec<sup>®</sup> vaccine (LT). Evaluation times: T0 = before the first immunization, T1 = 15 days after the third immunization. The significant differences ( $p < 0.05$ ) are represented by the letters a, b, c, and d related to groups C, LBSap, LM, LT, respectively.
